# Supplementary material for: Fabrication and origin of flame retarding glass fiber/bismaleimide resin composites with high thermal stability, good mechanical properties, and a low dielectric constant and loss for high frequency copper clad laminates
Source: Royal Society of Chemistry journal article supplement (doi:10.1039/c6ra00067c), 2016-01-01
Supplement: c6ra00067c1.pdf [file c6ra00067c1.pdf]

**Fabrication and origin of flame retarding glass fiber/bismaleimide resin  
composites with high thermal stability, high mechanical property, low dielectric  
constant and loss for high frequency copper clad laminates**

Zhiyong Zhang, Li Yuan, Guozheng Liang\*, Aijuan Gu\*

State and Local Joint Engineering Laboratory for Novel Functional Polymeric Materials  
Jiangsu Key Laboratory of Advanced Functional Polymer Design and Application,  
Department of Materials Science and Engineering  
College of Chemistry, Chemical Engineering and Materials Science  
Soochow University, Suzhou 215123, China

\*To whom all correspondence should be addressed

Tel: +86 512 65880967

Fax: +86 512 65880089

Email: lgzheng@suda.edu.cn (Guozheng Liang), ajgu@suda.edu.cn (Aijuan Gu),

**Table S1 Fiber content for composites**

| Composite           | Fibre content (wt%) |
|---------------------|---------------------|
| GF/BD               | 66.8                |
| aPHSi-g-GF/BD       | 67.6                |
| GF/5aPSiBD          | 67.1                |
| GF/10aPSiBD         | 67.6                |
| GF/15aPSiBD         | 68.1                |
| aPHSi-g-GF/5aPSiBD  | 68.2                |
| aPHSi-g-GF/10aPSiBD | 68.3                |
| aPHSi-g-GF/15aPSiBD | 68.0                |

**Table S2 Characteristic data from TG analyses in a N<sub>2</sub> atmosphere**

| Composite          | Heating rate<br>(°C/min) | $T_{di}$<br>(°C) | $T_{max}$<br>(°C) | $Y_c$ at 800 °C<br>(wt%) |
|--------------------|--------------------------|------------------|-------------------|--------------------------|
| GF/BD              | 10                       | 431.1            | 441.7             | 81.1                     |
|                    | 20                       | 446.7            | 460.0             | 83.1                     |
|                    | 30                       | 453.4            | 468.8             | 83.7                     |
|                    | 40                       | 462.2            | 478.1             | 84.3                     |
| aPHSi-g-GF/BD      | 10                       | 435.9            | 448.0             | 83.1                     |
|                    | 20                       | 450.0            | 465.6             | 84.3                     |
|                    | 30                       | 458.8            | 472.9             | 83.9                     |
|                    | 40                       | 465.4            | 481.9             | 84.6                     |
| GF/5aPSiBD         | 10                       | 443.8            | 448.4             | 83.3                     |
|                    | 20                       | 458.1            | 457.3             | 84.3                     |
|                    | 30                       | 462.8            | 474.2             | 84.5                     |
|                    | 40                       | 468.9            | 496.3             | 85.8                     |
| aPHSi-g-GF/5aPSiBD | 10                       | 444.2            | 447.3             | 86.9                     |
|                    | 20                       | 451.0            | 463.5             | 87.2                     |
|                    | 30                       | 464.9            | 471.5             | 87.3                     |
|                    | 40                       | 473.5            | 480.8             | 88.5                     |

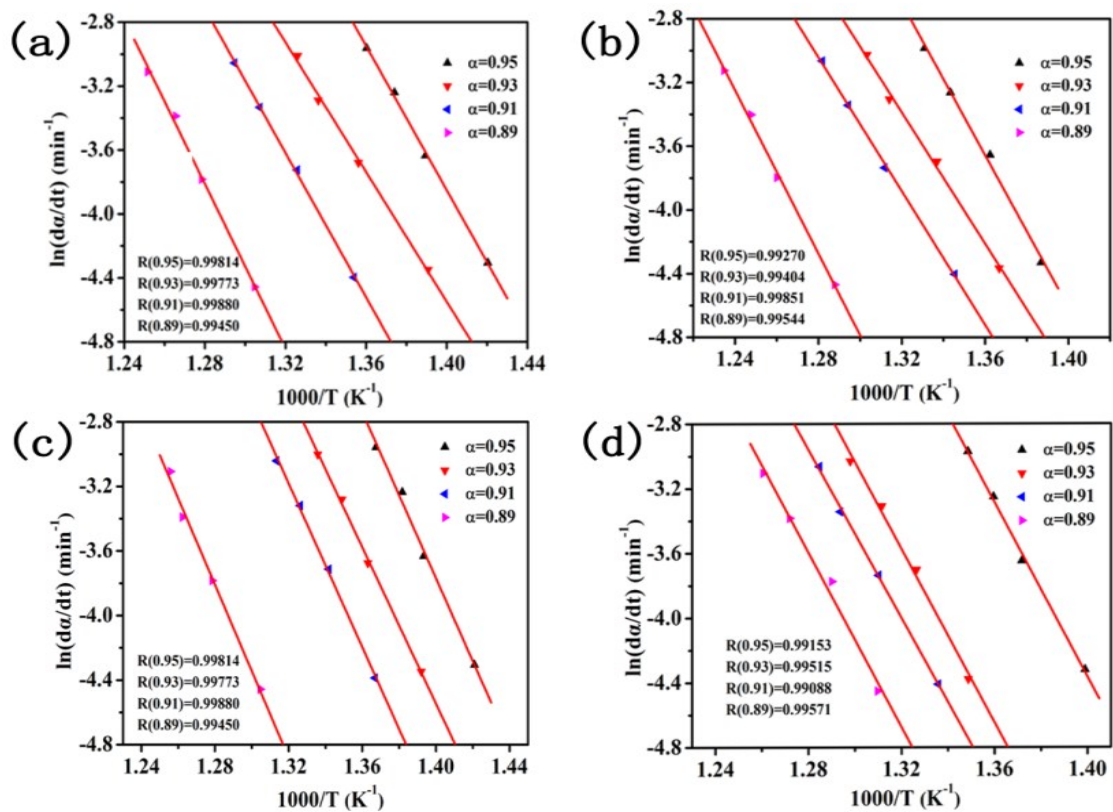

Fig. S1 The Friedman graphs for composites (a: GF/BD, b: aPHSi-g-GF/BD, c: GF/5aPSiBD and aPHSi-g-GF/5aPSiBD):  $\ln(da/dt)$  versus  $1000/T$
